# Supplementary material
Source: PubMed Central journal article supplement (PMC6420670)
Supplement: 11606_2018_4714_MOESM1_ESM.pdf [file 11606_2018_4714_MOESM1_ESM.pdf]

## Appendix

### PubMed:

---

```
=> ((((((("bedside round*") OR "ward round*") OR "teaching round*"))
AND ((((((("patient know*") OR "patient comprehen*") OR "patient understand*")) OR ("clinical
outcome") OR "quality of care")) OR "client satisf*") OR "patient satisf*"))
AND random*)
```
